# Supplementary material for: Immune Infiltration Correlates with Transcriptomic Subtypes in Primary ER+ Invasive Lobular Breast Cancer
Source: Research Square preprint supplement (doi:10.21203/rs.3.rs-4579052/v1), 2024-08-13
Supplement: Supplementary file 1 [file e484a4bec822de90f1dbec49.pdf]

# 1 Supplementary Figures

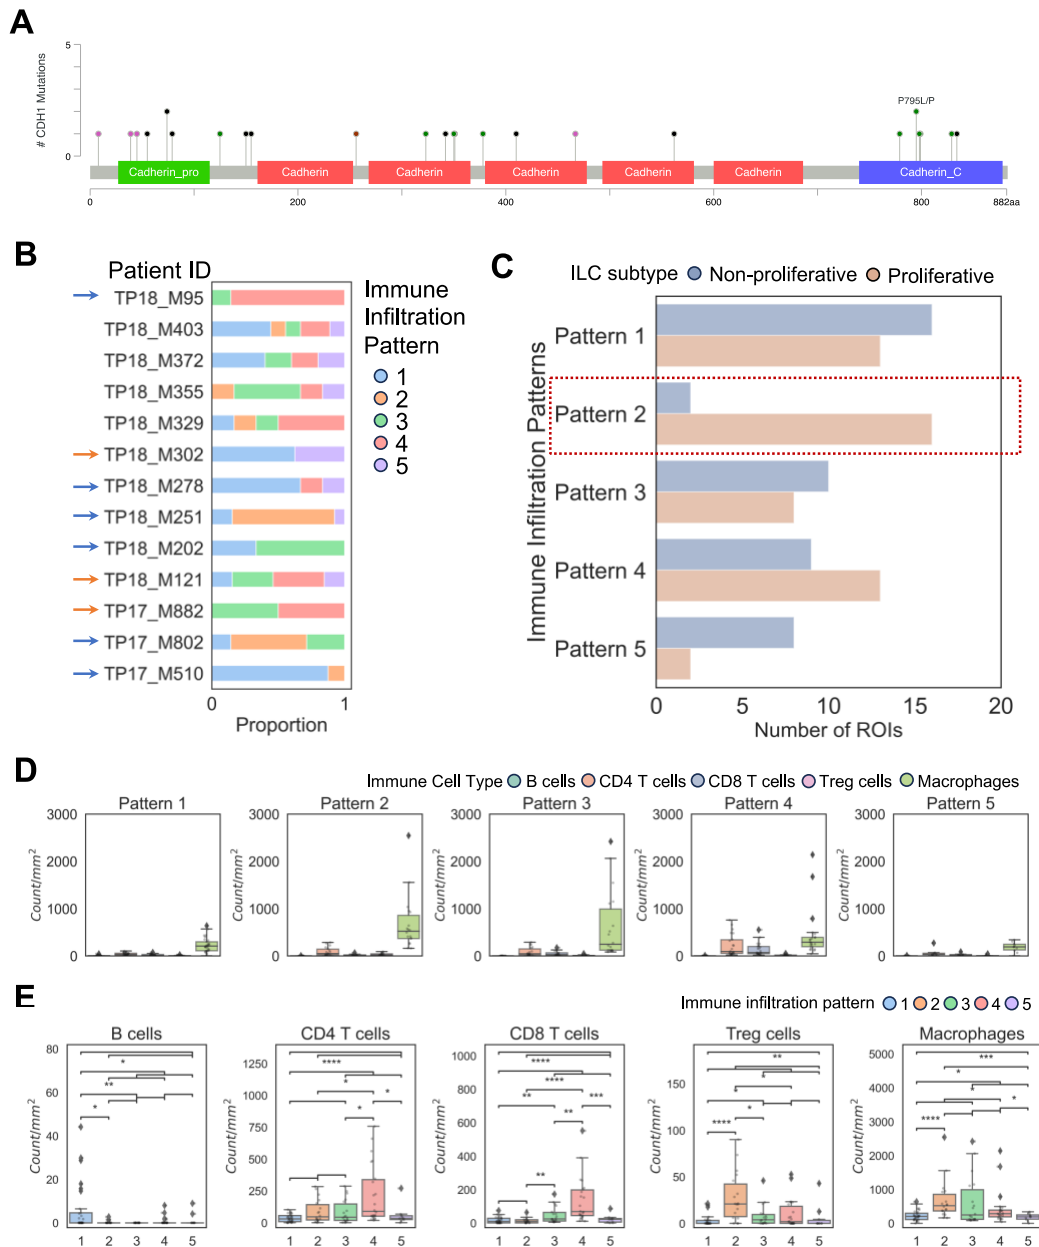

## 2 3 **Supplementary Figure 1. CDH1 mutation, ILC subtypes, and immune infiltration patterns**

4 A. Short variants of CDH1 detected from RNA-seq. B. Distribution of immune infiltration patterns among patient  
5 tumors. Blue arrows, patient with 1 dominant immune pattern. Orange arrows, patients with 2 dominant immune  
6 patterns. C. Number of immune infiltration patterns among ROIs in proliferative and non-proliferative ILC tumors. E.  
7 Tumor region immune cell infiltration (number/mm<sup>2</sup>) among immune infiltration patterns, showing each pattern  
8 per panel. \*\*\*\*p<0.0001, \*\*\*p<0.001, \*\*p<0.01, \*p<0.05, comparison (horizontal brackets) with no label, p≥0.05.  
9 F. Tumor region immune cell infiltration (number/mm<sup>2</sup>) among immune infiltration patterns, showing each immune  
10 cell type per panel.  
11

A

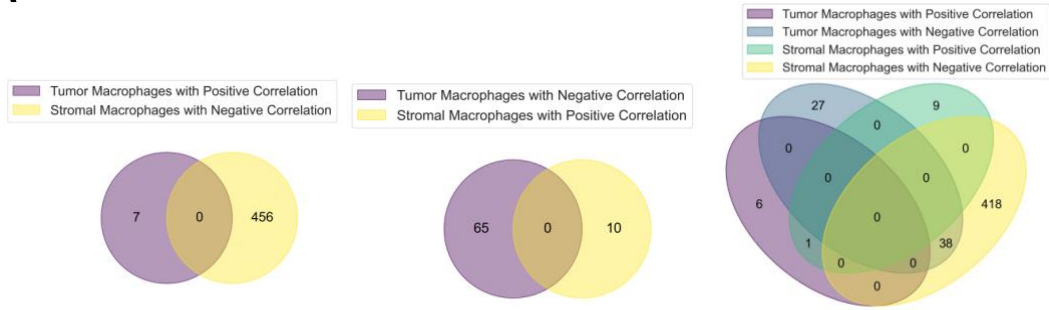

B

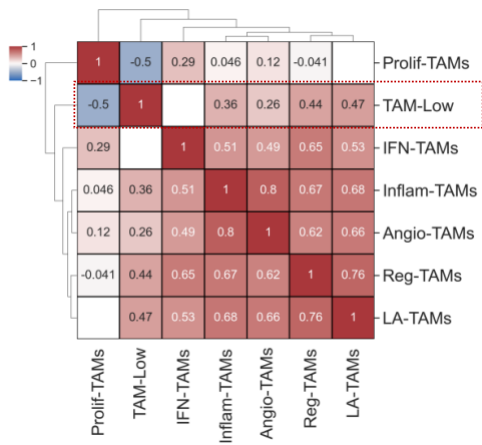

C

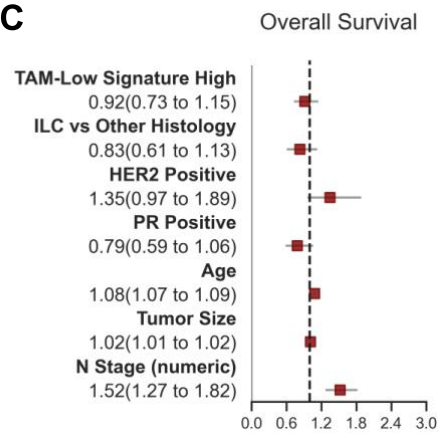

12

13 **Supplementary Figure 2. TAM-Low signature and clinical associations**

14 A Number of overlapped genes with expression positively or negatively correlated to stromal or tumor region  
 15 macrophage infiltration (number/mm<sup>2</sup>). B. Spearman correlation (FDR<0.05) between TAM-Low and other TAM  
 16 subtype signatures in SCAN-B ER+ tumors (N=2,776). C. Hazard ratio of overall survival of TAM-Low signature and  
 17 demographic-clinical variables in SCAN-B ER+ tumors (N=2,750, excluding entries with missing data in any of the  
 18 regression covariates) from multivariate Cox regression.

19

20 **Supplementary Tables**

21 **Supplementary Table 1. Clinical information and computed PAM50 and ILC subtypes from RNA-seq**

| Sample ID | Age at diagnosis | Race  | Postmenopausal | Pathological grade | Pathological stage | Ki67 | ER | PR | HER2 | ER IHC score* | ILC Subtype       | PAM50  |
|-----------|------------------|-------|----------------|--------------------|--------------------|------|----|----|------|---------------|-------------------|--------|
| TP17_M605 | 39               | White | No             | 1                  | 1A                 | 65   | +  | +  | -    | 140           | Non-proliferative | Normal |
| TP18_M403 | 67               | White | Yes            | 1                  | 1A                 | 1    | +  | -  | -    | 140           | Non-proliferative | Normal |
| TP17_M383 | 41               | White | No             | 3                  | 3C                 | 3    | +  | +  | -    | NA            | Proliferative     | Her2   |
| TP18_M202 | 56               | White | Yes            | 2                  | 1A                 | 15   | +  | +  | -    | 225           | Non-proliferative | Normal |
| TP18_M355 | 61               | Other | Yes            | 2                  | 1A                 | 5    | +  | +  | -    | 260           | Non-proliferative | Normal |
| TP17_M510 | 44               | White | No             | 2                  | 1A                 | 15   | +  | +  | -    | 240           | Proliferative     | LumB   |
| TP17_M802 | 47               | White | No             | 2                  | 1A                 | 25   | +  | +  | NA   | 195           | Proliferative     | LumA   |
| TP17_M882 | 57               | White | Yes            | 2                  | 3A                 | 35   | +  | +  | -    | 300           | Proliferative     | LumB   |
| TP18_M329 | 57               | White | Yes            | 2                  | 1B                 | 8    | +  | +  | -    | 300           | Proliferative     | Basal  |
| TP17_M378 | 40               | Other | No             | 3                  | 2A                 | 30   | +  | +  | -    | 270           | Proliferative     | LumB   |
| TP17_M384 | 57               | White | Yes            | 1                  | 2A                 | 5    | +  | +  | -    | 225           | Proliferative     | LumA   |
| TP17_M559 | 66               | White | Yes            | 2                  | 1A                 | 5    | +  | +  | -    | 260           | Non-proliferative | LumA   |
| TP18_M121 | 50               | White | Yes            | 2                  | 2A                 | 65   | +  | +  | -    | 230           | Non-proliferative | Normal |
| TP18_M278 | 75               | White | Yes            | 1                  | 1A                 | 20   | +  | +  | -    | 179           | Non-proliferative | Normal |
| TP18_M302 | 56               | White | Yes            | 2                  | 1A                 | 2    | +  | +  | -    | 290           | Non-proliferative | Normal |
| TP18_M372 | 62               | White | Yes            | 2                  | 1A                 | 10   | +  | +  | -    | 290           | Proliferative     | LumA   |
| TP18_M95  | 68               | White | Yes            | 2                  | 1A                 | 15   | +  | +  | -    | 260           | Proliferative     | LumB   |
| TP18_M251 | 74               | White | Yes            | 2                  | 1B                 | 12   | +  | +  | -    | 255           | Proliferative     | LumB   |
| TP17_M622 | 79               | White | Yes            | 2                  | 2B                 | 15   | +  | +  | -    | 200           | Proliferative     | Basal  |
| TP17_M899 | 37               | White | No             | 2                  | 2A                 | 2    | +  | +  | -    | 260           | Proliferative     | Normal |
| TP17_M901 | 45               | White | No             | 2                  | 1A                 | 3    | +  | +  | NA   | 75            | Non-proliferative | Normal |

22  
 23 \*ER IHC score: histochemical score of ER staining, corresponding to sum of tumor cell proportion multiplied by  
 24 staining reactivity (<50, negative; 50-100: weakly positive; 101-200: moderately positive; 201-300: strongly  
 25 positive). +, positive; -, negative; NA, not available. LumA, luminal A; LumB, luminal B; Basal, basal-like; normal,  
 26 normal-like.

27 **Supplementary Table 2. CDH1 mutations identified from RNA-seq from chromosome 16**

| Sample ID | Start Position | End Position | Reference Allele | Variant Allele | Protein Change | dbSNP147    |
|-----------|----------------|--------------|------------------|----------------|----------------|-------------|
| A1_S12    | 68768474       | 68768474     | C                | T              | Other          | .           |
| A1_S12    | 68801811       | 68801811     | C                | T              | A102V          | rs786202689 |
| A1_S12    | 68812177       | 68812177     | C                | T              | Q351*          | .           |
| A1_S12    | 68813423       | 68813423     | G                | C              | L416F          | rs772622537 |
| A1_S12    | 68829742       | 68829742     | C                | T              | P795L          | .           |
| A1_S12    | 68829743       | 68829743     | C                | T              | P795P          | .           |
| C2_S13    | 68783696       | 68783696     | A                | G              | Other          | .           |
| C2_S13    | 68812076       | 68812076     | C                | T              | Other          | .           |
| C2_S13    | 68822260       | 68822260     | C                | T              | Other          | .           |
| C2_S13    | 68833349       | 68833352     | TGAC             | -              | D834Mfs*11     | .           |
| D2_S14    | 68741164       | 68741164     | A                | G              | Other          | .           |
| D2_S14    | 68741165       | 68741165     | G                | T              | Other          | .           |
| D2_S14    | 68772926       | 68772926     | -                | A              | Other          | .           |
| D2_S14    | 68811819       | 68811819     | C                | T              | T323I          | .           |
| D2_S14    | 68812174       | 68812174     | C                | T              | L350F          | .           |
| D2_S14    | 68822210       | 68822210     | C                | T              | Q641*          | rs587782750 |
| E2_S15    | 68819342       | 68819342     | C                | T              | S543F          | rs148400889 |
| H2_S16    | 68744554       | 68744554     | C                | T              | Other          | rs7200690   |
| H2_S16    | 68746891       | 68746891     | A                | G              | Other          | .           |
| H2_S16    | 68763554       | 68763554     | C                | A              | Other          | .           |
| H2_S16    | 68774984       | 68774984     | A                | G              | Other          | .           |
| H2_S16    | 68811631       | 68811631     | C                | T              | Other          | .           |
| H2_S16    | 68813403       | 68813403     | G                | T              | E410*          | .           |
| H2_S16    | 68823538       | 68823538     | T                | C              | A692A          | rs1801552   |
| K2_S17    | 68808403       | 68808403     | C                | T              | Other          | .           |
| K2_S17    | 68808743       | 68808743     | C                | T              | G194G          | rs786202924 |
| K2_S17    | 68823538       | 68823538     | T                | C              | A692A          | rs1801552   |
| Q2_S18    | 68737469       | 68737469     | C                | T              | Other          | rs3743674   |
| Q2_S18    | 68738383       | 68738383     | C                | T              | H45H           | .           |
| Q2_S18    | 68775895       | 68775895     | C                | T              | Other          | .           |
| Q2_S18    | 68801740       | 68801741     | CA               | -              | T79Rfs*14      | .           |
| Q2_S18    | 68812145       | 68812145     | C                | T              | T340M          | rs61747631  |
| Q2_S18    | 68819396       | 68819397     | AC               | -              | T562Sfs*25     | .           |
| Q2_S18    | 68823440       | 68823440     | -                | T              | D662*          | rs730881653 |
| Q2_S18    | 68828142       | 68828142     | C                | T              | Other          | .           |
| R1_S21    | 68753598       | 68753598     | A                | G              | Other          | .           |

|          |          |          |    |    |            |             |
|----------|----------|----------|----|----|------------|-------------|
| R1_S21   | 68773143 | 68773143 | A  | G  | Other      | .           |
| R1_S21   | 68809340 | 68809340 | A  | G  | Other      | .           |
| R1_S21   | 68809342 | 68809342 | A  | G  | Other      | .           |
| R1_S21   | 68812124 | 68812125 | TC | -  | Other      | .           |
| R1_S21   | 68823538 | 68823538 | T  | C  | A692A      | rs1801552   |
| S2_S19   | 68801879 | 68801879 | C  | A  | P125T      | .           |
| S2_S19   | 68823538 | 68823538 | T  | C  | A692A      | rs1801552   |
| S2_S19   | 68829750 | 68829750 | C  | T  | L798F      | .           |
| S2_S19   | 68829756 | 68829756 | C  | T  | R800C      | rs587782162 |
| T2_S20   | 68755191 | 68755191 | A  | G  | Other      | .           |
| T2_S20   | 68757954 | 68757954 | A  | G  | Other      | .           |
| T2_S20   | 68815595 | 68815595 | C  | T  | T467T      | .           |
| T2_S20   | 68822234 | 68822234 | C  | T  | Other      | .           |
| T2_S20   | 68823538 | 68823538 | T  | C  | A692A      | rs1801552   |
| T2_S20   | 68829693 | 68829693 | C  | T  | R779W      | .           |
| T2_S20   | 68834203 | 68834203 | C  | T  | Other      | .           |
| O_10_S8  | 68742490 | 68742490 | C  | T  | Other      | .           |
| O_10_S8  | 68751036 | 68751036 | C  | T  | Other      | .           |
| O_10_S8  | 68801726 | 68801726 | C  | T  | R74*       | .           |
| O_10_S8  | 68812259 | 68812259 | C  | T  | T378I      | .           |
| O_10_S8  | 68819417 | 68819417 | C  | T  | T568I      | rs786202712 |
| O_11_S9  | 68808485 | 68808485 | G  | -  | R150Kfs*65 | .           |
| O_11_S9  | 68811990 | 68811990 | -  | A  | Other      | rs148398896 |
| O_11_S9  | 68811991 | 68811991 | -  | A  | Other      | rs33945588  |
| O_11_S9  | 68813274 | 68813274 | C  | T  | Other      | .           |
| O_11_S9  | 68813293 | 68813293 | C  | T  | Other      | .           |
| O_11_S9  | 68819200 | 68819200 | C  | G  | Other      | rs9934882   |
| O_11_S9  | 68822185 | 68822185 | C  | T  | H632H      | rs33969373  |
| O_11_S9  | 68823538 | 68823538 | T  | C  | A692A      | rs1801552   |
| O_11_S9  | 68833284 | 68833284 | C  | G  | Other      | rs139757930 |
| O_11_S9  | 68833484 | 68833484 | C  | T  | G878G      | rs2229044   |
| O_11_S9  | 68833553 | 68833553 | C  | T  | Other      | rs1801026   |
| O_12_S10 | 68808493 | 68808493 | -  | AG | D155Efs*61 | .           |
| O_12_S10 | 68823538 | 68823538 | T  | C  | A692A      | rs1801552   |
| O_12_S10 | 68833336 | 68833336 | C  | T  | S829F      | .           |
| O_13_S11 | 68757182 | 68757182 | A  | G  | Other      | .           |
| O_13_S11 | 68813336 | 68813336 | C  | T  | N387N      | rs111266450 |
| O_13_S11 | 68829708 | 68829708 | C  | T  | R784C      | rs775922721 |
| O_1_S1   | 68737469 | 68737469 | C  | T  | Other      | rs3743674   |

|        |          |          |    |     |               |             |
|--------|----------|----------|----|-----|---------------|-------------|
| O_1_S1 | 68765268 | 68765268 | A  | G   | Other         | .           |
| O_1_S1 | 68800033 | 68800033 | -  | A   | Other         | rs34387170  |
| O_1_S1 | 68823538 | 68823538 | T  | C   | A692A         | rs1801552   |
| O_4_S2 | 68821949 | 68821949 | G  | C   | Other         | rs34582129  |
| O_4_S2 | 68822268 | 68822268 | C  | T   | Other         | .           |
| O_4_S2 | 68823538 | 68823538 | T  | C   | A692A         | rs1801552   |
| O_4_S2 | 68829754 | 68829754 | C  | T   | P799L         | .           |
| O_4_S2 | 68833844 | 68833844 | C  | T   | Other         | .           |
| O_5_S3 | 68737469 | 68737469 | C  | T   | Other         | rs3743674   |
| O_5_S3 | 68795504 | 68795505 | TT | -   | Other         | .           |
| O_5_S3 | 68823538 | 68823538 | T  | C   | A692A         | rs1801552   |
| O_5_S3 | 68831161 | 68831161 | C  | T   | Other         | .           |
| O_6_S4 | 68738365 | 68738365 | C  | T   | F39F          | .           |
| O_6_S4 | 68759192 | 68759192 | A  | G   | Other         | .           |
| O_6_S4 | 68812147 | 68812148 | TA | -   | T342Pfs*7     | .           |
| O_6_S4 | 68823538 | 68823538 | T  | C   | A692A         | rs1801552   |
| O_7_S5 | 68737439 | 68737439 | C  | T   | L8L           | .           |
| O_7_S5 | 68737464 | 68737464 | G  | A   | Other         | .           |
| O_7_S5 | 68737469 | 68737469 | C  | T   | Other         | rs3743674   |
| O_7_S5 | 68738411 | 68738411 | G  | -   | V55*          | .           |
| O_7_S5 | 68738413 | 68738413 | T  | A   | Other         | .           |
| O_7_S5 | 68753972 | 68753972 | G  | A   | Other         | rs12926010  |
| O_7_S5 | 68759633 | 68759633 | G  | A   | Other         | rs12448199  |
| O_7_S5 | 68812127 | 68812127 | C  | T   | Other         | rs201227194 |
| O_7_S5 | 68823386 | 68823386 | T  | C   | Other         | rs2276330   |
| O_7_S5 | 68823538 | 68823538 | T  | C   | A692A         | rs1801552   |
| O_8_S6 | 68737339 | 68737339 | C  | T   | Other         | .           |
| O_8_S6 | 68745790 | 68745790 | A  | G   | Other         | rs13335476  |
| O_8_S6 | 68810351 | 68810351 | C  | T   | Other         | .           |
| O_8_S6 | 68823538 | 68823538 | T  | C   | A692A         | rs1801552   |
| O_8_S6 | 68824887 | 68824887 | C  | T   | Other         | .           |
| O_9_S7 | 68745270 | 68745270 | C  | T   | Other         | .           |
| O_9_S7 | 68768613 | 68768613 | T  | G   | Other         | rs12448448  |
| O_9_S7 | 68771354 | 68771354 | A  | G   | Other         | .           |
| O_9_S7 | 68771356 | 68771356 | A  | G   | Other         | .           |
| O_9_S7 | 68801726 | 68801726 | C  | T   | R74*          | .           |
| O_9_S7 | 68810276 | 68810276 | -  | TTC | N256_D257insS | .           |
| O_9_S7 | 68819200 | 68819200 | C  | G   | Other         | rs9934882   |
| O_9_S7 | 68822185 | 68822185 | C  | T   | H632H         | rs33969373  |

|        |          |          |   |   |       |            |
|--------|----------|----------|---|---|-------|------------|
| O_9_S7 | 68822260 | 68822260 | C | T | Other | .          |
| O_9_S7 | 68823538 | 68823538 | T | C | A692A | rs1801552  |
| O_9_S7 | 68824608 | 68824608 | G | T | Other | .          |
| O_9_S7 | 68824971 | 68824971 | A | C | Other | rs74025315 |
| O_9_S7 | 68824974 | 68824974 | C | T | Other | .          |
| O_9_S7 | 68824984 | 68824984 | G | T | Other | .          |
| O_9_S7 | 68833484 | 68833484 | C | T | G878G | rs2229044  |
| O_9_S7 | 68833553 | 68833553 | C | T | Other | rs1801026  |
| O_9_S7 | 68834120 | 68834120 | C | T | Other | rs33956791 |

28 Somatic SNVs and indels in CDH1 identified from RNA-seq using GATK v4 MuTect2 pipeline. Truncating mutations  
29 were marked in red.  
30  
31  
32

**Supplementary Table 3. TAM-Low signature and Marker genes of TAM subtypes derived from literature**

|                                 |                                                                                                                                                                                                                                                                                                                                                                                                                                                                                                                                                                                                                                                                                                                                                                                                                                                                                                                                                                                                                                                                                                                                                                                                                                                                                                                                                                                                                                                                                                                                                                                                                                                                                                                                                                                                                                                                                                                                                                                                                                                                                                                                                                                                                                                                                                                                                                                                                                                                                                                                                                                                                                                                                                                                                                                                                                                                                                                                                                                                                                                                                                                                                                                                                                                                                                                                                                                                                                                                                                                                                                                                                                    |
|---------------------------------|------------------------------------------------------------------------------------------------------------------------------------------------------------------------------------------------------------------------------------------------------------------------------------------------------------------------------------------------------------------------------------------------------------------------------------------------------------------------------------------------------------------------------------------------------------------------------------------------------------------------------------------------------------------------------------------------------------------------------------------------------------------------------------------------------------------------------------------------------------------------------------------------------------------------------------------------------------------------------------------------------------------------------------------------------------------------------------------------------------------------------------------------------------------------------------------------------------------------------------------------------------------------------------------------------------------------------------------------------------------------------------------------------------------------------------------------------------------------------------------------------------------------------------------------------------------------------------------------------------------------------------------------------------------------------------------------------------------------------------------------------------------------------------------------------------------------------------------------------------------------------------------------------------------------------------------------------------------------------------------------------------------------------------------------------------------------------------------------------------------------------------------------------------------------------------------------------------------------------------------------------------------------------------------------------------------------------------------------------------------------------------------------------------------------------------------------------------------------------------------------------------------------------------------------------------------------------------------------------------------------------------------------------------------------------------------------------------------------------------------------------------------------------------------------------------------------------------------------------------------------------------------------------------------------------------------------------------------------------------------------------------------------------------------------------------------------------------------------------------------------------------------------------------------------------------------------------------------------------------------------------------------------------------------------------------------------------------------------------------------------------------------------------------------------------------------------------------------------------------------------------------------------------------------------------------------------------------------------------------------------------------|
| TAM-Low signature               | <p>AASS, ABCA10, ABCA6, ABCA8, ABCA9, ABCC9, ABI3BP, ABT1, ACOT9, ADAM22, ADAM33, ADAMTS1, ADAMTS3, ADAMTS5, ADAMTS9, ADD1, ADD3, ADGRA2, ADGRD1, ADGRL2, AKAP12, AKAP13, AKAP6, ALDH1A1, ALX4, AMOTL1, AMOTL2, ANGPTL1, ANK2, ANKRD11, ANKRD20A12P, ANTXR2, ANXA1, ANXA8, ARHGAP10, ARHGAP6, ARHGEF25, ARID5B, ATP10D, ATP11A, ATP8B2, AXL, BACH1, BACH2, BAG2, BBS2, BCHE, BHLHE22, BICC1, BICD2, BMP1, BNC2, BNIP2, BOC, BRD7, C14orf37, C1S, CACHD1, CACNA1G, CAPN6, CAV1, CAV2, CCDC80, CCDC82, CCL18, CCND2, CD163L1, CD34, CD99, CDH5, CDK11A, CDK6, CEBPB-AS1, CEP112, CEP85L, CES1, CFDP1, CFH, CFI, CHD9, CHL1, CHRDL1, CLCA4, CLEC12A, CLEC4G, CLIC2, CLIP4, CLMP, CNGA1, CNRIP1, COL14A1, COL16A1, COL21A1, COPZ2, CPE, CPNE8, CRCP, CRISPLD2, CRYBG3, CSPG4, CTSG, CTSK, CYP2U1, CYTH3, DAAM2, DAB2, DCBLD2, DCDC2C, DCN, DDR2, DDX19B, DDX60L, DENND2C, DHRS3, DHX38, DIAPH2, DKK2, DLX5, DNAJB4, DNAJC18, DNAJC8, DNM1, DNM3, DOK4, DOK6, DPT, DPYSL2, DPYSL3, DUS2, DZIP1, EBF3, ECM2, EFEMP2, EGFR, EHBP1, EHD2, ELN, EMILIN2, EMP1, EPDR1, ERC1, F13A1, FAM126A, FAM133CP, FAM180A, FAM49A, FAS, FAT4, FBLN1, FBLN2, FBLN5, FCGR2C, FCGRT, FES, FEZ1, FGD5P1, FGFR1OP2, FIGLA, FKBP9, FLNA, FLNC, FLRT2, FOXP2, FRMD3, FRRS1, FSTL1, GAS1, GAS7, GBTG1, GDF10, GEM, GFPT2, GIT2, GLG1, GLI1, GLI2, GLIPR2, GLS, GNG11, GOLGA8R, GOLIM4, GOPC, GPNMB, GRAP, GRID1, GRID2, GRIP2, GSN, HEG1, HERC3, HIF3A, HMCN1, HNMT, HNRNP, HRH1, HSPB6, HTR2A, ID1, ID3, IFI44, IGF1, IGFBP4, IGFBP6, IGSF10, IL1R1, ILK, INVS, ISLR, IST1, ITSN1, IWS1, JAM3, JDP2, KCNB1, KCNJ12, KCNT1, KCNT2, KIAA1614, KLC1, KLHL2, KLHL33, LAMA2, LAMA4, LAMB1, LDB2, LEPR, LIMA1, LINC01279, LMNA, LMOD1, LOC653513, LONRF1, LOX, LOXL4, LPPR4, LRCH2, LRCH3, LRFN5, LRIG3, LRP1, LRP12, LRRK2, LTBP2, LTBP4, LUM, LUZP1, MAF, MAGI2-AS3, MAP1A, MAP1B, MAP3K3, MAP7D3, MBNL1, MCTP1, MEDAG, MEG3, MEGF6, MEIS2, MEOX2, METTL24, MFAP4, MGA, MICU3, MID1, MIR100HG, MIR24-1, MIR655, MIR99AHG, MMP16, MMP19, MMRN1, MOXD1, MPP6, MRAS, MRGPRF, MSN, MX2, MYL9, MYOM1, NEGR1, NEXN, NFATC3, NGDN, NID1, NIN, NMT2, NOM1, NR5A2, NRXN2, ODF3L1, OGN, OLFML1, OMD, OSR2, PALLD, PAPP, PARD3B, PCDH18, PCDH9, PCDHGC3, PCOLCE, PCSK5, PDE2A, PDE3A, PDE8A, PDGFRB, PDGFRL, PI16, PID1, PITPNB, PKD2, PKHD1L1, PLAC9, PLAGL1, PLBD1, PLEKHM2, PLS3, PLSCR4, PNMAL1, PODN, POU6F2, PPFIBP1, PRDM5, PRELID2, PRELP, PREX2, PRKD1, PRKG1, PROS1, PRR5, PRRX1, PRRX2, PTGER2, PTGFR, PTGIS, PTPRH, PTRF, PTX3, PVRL3, RASA3, RASSF1, RBMS2, RBMS3, RBMX2, RBPJ, RCN3, RECK, RFTN2, RFX6, RGL1, RGS6, RNF216, ROCK2, ROR1, RPS6KA2, RUNX1T1, RYR3, SACS, SAMD4A, SCARA5, SCN3A, SEC23A, SEMA3D, SERPINE2, SERPING1, SFRP2, SFRP4, SH3BP5, SH3D19, SH3PXD2B, SHE, SHOX2, SKIDA1, SLC23A2, SLC25A27, SLFN11, SLIT2, SLIT3, SMAD9, SNED1, SNORD112, SNORD114-12, SNORD114-14, SNORD114-18, SNX1, SNX18, SNX29P2, SOCS5, SOD3, SPAG9, SPARCL1, SPOCK1, SPRY1, SRSF4, ST6GALNAC3, STAB2, STAC, STARD9, STEAP4, STX12, STX1B, STXPB1, SYNE1, SYT11, SZRD1, TACC1, TBKBP1, TBX15, TBX18, TCEAL2, TCEAL5, TCF4, TCF7L2, TERF2IP, TFPI, THSD7B, TIMP2, TLE4, TLL1, TLN1, TMEM117, TMEM119, TMEM130, TMEM200A, TNNT3, TNXB, TPM4, TRAM2, TRDN, TRPC1, TSHZ3, TSSC2, TTC7B, TUBB6, TWIST2, UACA, UBDT1, VASN, VCL, VIM, WASF2, WASF3, WBP5, WWTR1, XPNPEP2, ZBTB47, ZC3H18, ZCCHC24, ZEB1, ZFH4, ZFP90, ZNF354C, ZNF438, ZNF521, ZNF697, ZSCAN12, ACVR2A, ALDH1L2, COL5A3, COX19, DNASE1L3, EMX2, FNIP2, FOLR2, FOSB, GUCY1B3, KLF4, L1CAM, LILRB5, LYVE1, MRC1, PIM1, PNMAL2, RNASE1, RYR2, S100A6, SCN2B, SCN9A, SMCO4, SNAPC1, VTRNA2-1, YBX1, ZNF732</p> |
| Interferon-primed TAM (IFN-TAM) | <p>CASP1, CASP4, CCL2, CCL3, CCL4, CCL7, CCL8, CD274, CD40, CXCL2, CXCL3, CXCL9, CXCL10, CXCL11, IDO1, IFI6, IFIT1, IFIT2, IFIT3, IFITM1, IFITM3, IRF1, IRF7, ISG15, LAMP3, PDCD1LG2, TNFSF10, C1QA, C1QC, CD38, IL4I1, ISG15, TNFSF10, IFI44L</p>                                                                                                                                                                                                                                                                                                                                                                                                                                                                                                                                                                                                                                                                                                                                                                                                                                                                                                                                                                                                                                                                                                                                                                                                                                                                                                                                                                                                                                                                                                                                                                                                                                                                                                                                                                                                                                                                                                                                                                                                                                                                                                                                                                                                                                                                                                                                                                                                                                                                                                                                                                                                                                                                                                                                                                                                                                                                                                                                                                                                                                                                                                                                                                                                                                                                                                                                                                                 |

|                                                 |                                                                                                                                                                                                                                                               |
|-------------------------------------------------|---------------------------------------------------------------------------------------------------------------------------------------------------------------------------------------------------------------------------------------------------------------|
| Immune regulatory TAM (Reg-TAM)                 | CCL2, CD274, CD40, CD80, CD86, CHIT1, CX3CR1, HLA-A, HLA-C, HLA-DQA1, HLA-DQB1, HLA-DRA, HLA-DRB1, HLA-DRB5, ICOSLG, IL10, ITGA4, LGALS9, MACRO, MRC1, TGFB2                                                                                                  |
| Inflammatory cytokine-enriched TAM (Inflam-TAM) | CCL2, CCL3, CCL4, CCL5, CCL20, CCL3L1, CCL3L3, CCL4L2, CCL4L4, CXCL1, CXCL2, CXCL3, CXCL5, CXCL8, GOS2, IL1B, IL1RN, IL6, INHBA, KLF2, KLF6, NEDD9, PMAIP1, S100A8, S100A9, SPP1                                                                              |
| Proangiogenic TAM (Angio-TAM)                   | ADAM8, AREG, BNIP3, CCL2, CCL4, CCL20, CD163, CD300E, CD44, CD55, CEBPB, CLEC5A, CTSB, EREG, FCN1, FLT1, FN1, HES1, IL1B, IL1RN, IL8, MAF, MIF, NR1H3, OLR1, PPARG, S100A8, S100A9, S100A12, SERPINB2, SLC2A1, SPIC, SPP1, THBS1, TIMP1, VCAN, VEGFA          |
| Lipid-associated TAMs (lipid-associated TAM)    | ACP5, AOPE, APOC1, ATF1, C1QA, C1QB, C1QC, CCL18, CD163, CD36, CD63, CHI3L1, CTSB, CTSD, CTSL, F13A1, FABP5, FOLR2, GPNMB, IRF3, LGALS3, LIPA, LPL, MACRO, MerTK, MMP7, MMP9, MMP12, MRC1, NR1H3, NRF1, NUPR1, PLA2G7, RNASE1, SPARC, SPP1, TFD2, TREM2, ZEB1 |
| Proliferating TAM (Prolif-TAM)                  | CCNA2, CDC45, CDK1, H2AFC, HIST1H4C, HMGB1, HMGN2, MKI67, RRM2, STMN1, TOP2A, TUBA1B, TUBB, TYMS                                                                                                                                                              |
